# Supplementary material for: Educational expectations and adolescent health behaviour: an evolutionary approach
Source: Springer Nature journal article supplement (doi:10.1007/s00038-015-0692-9), 2015-05-20
Supplement: MOESM1 [file 38_2015_692_MOESM1_ESM.pdf]

## Educational expectations and adolescent health behaviour: an evolutionary approach

Ross Whitehead<sup>a</sup>, Dorothy Currie, Jo Inchley and Candace Currie

*International Journal of Public Health*

Electronic Supplementary Material - Descriptive statistics for school-level control variables and full details of logistic regression models for 11 health-related behaviours

<sup>a</sup> Correspondence concerning this article should be addressed to: Ross D. Whitehead, Child and Adolescent Health Research Unit, School of Medicine, Medical and Biological Sciences Building, University of St Andrews, St Andrews, Fife, KY16 9TF. Email: rw394@st-andrews.ac.uk.

Electronic Supplementary Material Table 1. Descriptive statistics for school-level control variables (113 schools) in a 2010 sample of Scottish school children.<sup>a</sup>

|                                                               | Mean proportion (%) / score ( $\pm$ SD) |
|---------------------------------------------------------------|-----------------------------------------|
| Expecting university attendance                               | 50.6 (17.8)                             |
| School-level family affluence                                 |                                         |
| High *** b                                                    | 35.8 (14.9)                             |
| Medium <sup>b</sup>                                           | 30.2 (12.1)                             |
| Low *** c                                                     | 34.0 (16.3)                             |
| Leavers attending higher education *** c                      | 36.4 (12.5)                             |
| Achieve 5+ 'Standard Grade' awards at level 4 or higher *** b | 78.6 (10.3)                             |
| Liking school a lot or a bit *** b                            | 65.8 (13.6)                             |
| Peer support <sup>*</sup> b                                   | 7.8 (0.6)                               |
| Teacher support <sup>b</sup>                                  | 7.4 (0.7)                               |

<sup>a</sup> Associations with school-level university expectations were determined by <sup>b</sup> Pearson ( $r$ ) or <sup>c</sup> Spearman ( $\rho$ ) correlation \*\*\*  $p < 0.001$  \*\*  $p < 0.005$  \*  $p < 0.005$ .

Electronic Supplementary Material Table 2 – Odds ratios (95% CI) from multi-level logistic regression models for daily fruit consumption ( $N=1,828$ ) in a 2010 sample of Scottish school children.

|                                  | <b>Model 1</b>                   | <b>Model 2</b>                   | <b>Model 3<sup>a</sup></b>       |
|----------------------------------|----------------------------------|----------------------------------|----------------------------------|
| University expectation           |                                  |                                  |                                  |
| No (ref)                         | 1.00                             | 1.00                             | 1.00                             |
| Yes                              | 2.22 (1.79, 2.76) <sup>***</sup> | 1.69 (1.33, 2.15) <sup>***</sup> | 1.71 (1.36, 2.16) <sup>***</sup> |
| <b>Student-level Controls</b>    |                                  |                                  |                                  |
| Pubertal Development (PDS)       | -                                | 1.14 (0.89, 1.46)                | -                                |
| Family affluence                 |                                  |                                  |                                  |
| High (ref)                       | -                                | 1.00                             | -                                |
| Medium                           | -                                | 0.82 (0.63, 1.08)                | -                                |
| Low                              | -                                | 0.95 (0.72, 1.25)                | -                                |
| Father absence                   |                                  |                                  |                                  |
| Father present (ref)             | -                                | 1.00                             | -                                |
| Father absent                    | -                                | 0.81 (0.62, 1.04)                | -                                |
| Age                              | -                                | 0.94 (0.66, 1.32)                | -                                |
| Gender                           |                                  |                                  |                                  |
| Female (ref)                     | -                                | 1.00                             | -                                |
| Male                             | -                                | 0.81 (0.64, 1.01)                | -                                |
| Perceived academic achievement   |                                  |                                  |                                  |
| Very good (ref)                  | -                                | 1.00                             | 1.00                             |
| Good                             | -                                | 0.72 (0.55, 0.93) <sup>*</sup>   | 0.69 (0.53, 0.90) <sup>*</sup>   |
| Average                          | -                                | 0.48 (0.35, 0.66) <sup>***</sup> | 0.46 (0.34, 0.62) <sup>***</sup> |
| Below average                    | -                                | 0.58 (0.32, 1.06)                | 0.52 (0.29, 0.94) <sup>*</sup>   |
| Father communication             |                                  |                                  |                                  |
| Difficult / very difficult (ref) | -                                | 1.00                             | -                                |
| Very easy / easy                 | -                                | 1.01 (0.80, 1.28)                | -                                |
| Mother communication             |                                  |                                  |                                  |
| Difficult / very difficult (ref) | -                                | 1.00                             | -                                |
| Very easy / easy                 | -                                | 1.14 (0.87, 1.49)                | -                                |
| Peer communication               |                                  |                                  |                                  |
| Difficult / very difficult (ref) | -                                | 1.00                             | -                                |
| Very easy / easy                 | -                                | 0.99 (0.66, 1.49)                | -                                |

### School-level Controls

|                                                   |   |                      |                      |
|---------------------------------------------------|---|----------------------|----------------------|
| % expecting university attendance                 | - | 0.64 (0.28, 1.46)    | -                    |
| School-level family affluence                     |   |                      |                      |
| % High (ref)                                      | - | 1.00                 | 1.00                 |
| % Medium                                          | - | 5.55 (1.87, 16.48)** | 4.65 (1.65, 13.09)** |
| % Low                                             | - | 2.02 (0.76, 5.35)    | 2.39 (1.01, 5.65)*   |
| % leavers attending higher education              | - | 1.03 (1.02, 1.05)*** | 1.03 (1.02, 1.04)*** |
| % achieving 5+ 'Standard Grade' awards at level 4 | - | 0.99 (0.97, 1.00)    | -                    |
| % liking school a lot / a bit                     | - | 1.01 (1.00, 1.02)    | -                    |
| Peer support                                      | - | 1.06 (0.86, 1.31)    | -                    |
| Teacher support                                   | - | 0.94 (0.78, 1.15)    | -                    |
| Constant                                          |   | 0.26 (0.22, 0.32)*** | 0.26 (0.00, 87.79)   |
|                                                   |   |                      | 0.08 (0.04, 0.17)*** |

<sup>a</sup> Model 3 removes from Model 2 all non-significant ( $p > 0.050$ ) student- and school-level covariates per health behaviour.

\*\*\*  $p < 0.001$ , \*\*  $p < 0.005$ , \*  $p < 0.050$ .

Electronic Supplementary Material Table 3 – Odds ratios (95% CI) from multi-level logistic regression models for daily vegetable consumption ( $N=1,827$ ) in a 2010 sample of Scottish school children.

|                                |                                  | <b>Model 1</b>                   | <b>Model 2</b>                   | <b>Model 3<sup>a</sup></b>       |
|--------------------------------|----------------------------------|----------------------------------|----------------------------------|----------------------------------|
| University expectation         |                                  |                                  |                                  |                                  |
|                                | No (ref)                         | 1.00                             | 1.00                             | 1.00                             |
|                                | Yes                              | 1.97 (1.61, 2.43) <sup>***</sup> | 1.50 (1.19, 1.89) <sup>**</sup>  | 1.51 (1.21, 1.89) <sup>***</sup> |
| <b>Student-level Controls</b>  |                                  |                                  |                                  |                                  |
| Pubertal Development (PDS)     |                                  | -                                | 0.99 (0.78, 1.25)                | -                                |
| Family affluence               |                                  |                                  |                                  |                                  |
|                                | High (ref)                       | -                                | 1.00                             | -                                |
|                                | Medium                           | -                                | 0.91 (0.71, 1.17)                | -                                |
|                                | Low                              | -                                | 0.87 (0.67, 1.13)                | -                                |
| Father absence                 |                                  |                                  |                                  |                                  |
|                                | Father present (ref)             | -                                | 1.00                             | 1.00                             |
|                                | Father absent                    | -                                | 0.73 (0.57, 0.94) <sup>*</sup>   | 0.72 (0.57, 0.93) <sup>*</sup>   |
|                                | Age                              | -                                | 1.18 (0.84, 1.65)                | -                                |
| Gender                         |                                  |                                  |                                  |                                  |
|                                | Female (ref)                     | -                                | 1.00                             | -                                |
|                                | Male                             | -                                | 0.81 (0.65, 1.00)                | -                                |
| Perceived academic achievement |                                  |                                  |                                  |                                  |
|                                | Very good (ref)                  | -                                | 1.00                             | 1.00                             |
|                                | Good                             | -                                | 0.68 (0.52, 0.88) <sup>**</sup>  | 0.67 (0.52, 0.87) <sup>**</sup>  |
|                                | Average                          | -                                | 0.48 (0.35, 0.65) <sup>***</sup> | 0.48 (0.35, 0.65) <sup>***</sup> |
|                                | Below average                    | -                                | 0.36 (0.19, 0.67) <sup>**</sup>  | 0.35 (0.19, 0.64) <sup>**</sup>  |
| Father communication           |                                  |                                  |                                  |                                  |
|                                | Difficult / very difficult (ref) | -                                | 1.00                             | -                                |
|                                | Very easy / easy                 | -                                | 0.98 (0.78, 1.23)                | -                                |
| Mother communication           |                                  |                                  |                                  |                                  |
|                                | Difficult / very difficult (ref) | -                                | 1.00                             | -                                |
|                                | Very easy / easy                 | -                                | 1.09 (0.84, 1.41)                | -                                |
| Peer communication             |                                  |                                  |                                  |                                  |
|                                | Difficult / very difficult (ref) | -                                | 1.00                             | -                                |
|                                | Very easy / easy                 | -                                | 1.20 (0.80, 1.79)                | -                                |

### School-level Controls

|                                                   |   |                                  |                                  |
|---------------------------------------------------|---|----------------------------------|----------------------------------|
| % expecting university attendance                 | - | 0.56 (0.24, 1.34)                | -                                |
| School-level family affluence                     |   |                                  |                                  |
| % High (ref)                                      | - | 1.00                             | -                                |
| % Medium                                          | - | 2.06 (0.66, 6.46)                | -                                |
| % Low                                             | - | 0.65 (0.23, 1.83)                | -                                |
| % leavers attending higher education              | - | 1.02 (1.00, 1.03) <sup>*</sup>   | 1.02 (1.01, 1.03) <sup>**</sup>  |
| % achieving 5+ 'Standard Grade' awards at level 4 | - | 1.00 (0.98, 1.01)                | -                                |
| % liking school a lot / a bit                     | - | 1.00 (0.99, 1.01)                | -                                |
| Peer support                                      | - | 1.13 (0.91, 1.41)                | -                                |
| Teacher support                                   | - | 0.93 (0.76, 1.14)                | -                                |
| Constant                                          |   | 0.34 (0.29, 0.40) <sup>***</sup> | 0.37 (0.24, 0.57) <sup>***</sup> |

<sup>a</sup> Model 3 removes from Model 2 all non-significant ( $p > 0.050$ ) student- and school-level covariates per health behaviour.

<sup>\*\*\*</sup>  $p < 0.001$ , <sup>\*\*</sup>  $p < 0.005$ , <sup>\*</sup>  $p < 0.050$ .

Electronic Supplementary Material Table 4 – Odds ratios (95% CI) from multi-level logistic regression models for 2+ hours exercise per week ( $N=1,805$ ) in a 2010 sample of Scottish school children.

|                                |                                  | <b>Model 1</b>                   | <b>Model 2</b>                   | <b>Model 3<sup>a</sup></b>       |
|--------------------------------|----------------------------------|----------------------------------|----------------------------------|----------------------------------|
| <b>University expectation</b>  |                                  |                                  |                                  |                                  |
|                                | No (ref)                         | 1.00                             | 1.00                             | 1.00                             |
|                                | Yes                              | 1.48 (1.22, 1.80) <sup>***</sup> | 1.31 (1.05, 1.64) <sup>*</sup>   | 1.39 (1.12, 1.71) <sup>**</sup>  |
| <b>Student-level Controls</b>  |                                  |                                  |                                  |                                  |
| Pubertal Development (PDS)     |                                  |                                  |                                  |                                  |
|                                |                                  | -                                | 1.22 (0.97, 1.53)                | -                                |
| Family affluence               |                                  |                                  |                                  |                                  |
|                                | High (ref)                       | -                                | 1.00                             | 1.00                             |
|                                | Medium                           | -                                | 0.78 (0.61, 1.00) <sup>*</sup>   | 0.77 (0.60, 0.98) <sup>*</sup>   |
|                                | Low                              | -                                | 0.64 (0.50, 0.82) <sup>***</sup> | 0.60 (0.48, 0.77) <sup>***</sup> |
| Father absence                 |                                  |                                  |                                  |                                  |
|                                | Father present (ref)             | -                                | 1.00                             | -                                |
|                                | Father absent                    | -                                | 0.98 (0.78, 1.23)                | -                                |
|                                | Age                              | -                                | 0.83 (0.60, 1.14)                | -                                |
| Gender                         |                                  |                                  |                                  |                                  |
|                                | Female (ref)                     | -                                | 1.00                             | 1.00                             |
|                                | Male                             | -                                | 1.69 (1.37, 2.09) <sup>***</sup> | 1.57 (1.29, 1.92) <sup>***</sup> |
| Perceived academic achievement |                                  |                                  |                                  |                                  |
|                                | Very good (ref)                  | -                                | 1.00                             | 1.00                             |
|                                | Good                             | -                                | 0.91 (0.70, 1.19)                | 0.91 (0.70, 1.18)                |
|                                | Average                          | -                                | 0.73 (0.54, 0.98) <sup>*</sup>   | 0.73 (0.54, 0.99) <sup>*</sup>   |
|                                | Below average                    | -                                | 0.79 (0.47, 1.33)                | 0.79 (0.47, 1.32)                |
| Father communication           |                                  |                                  |                                  |                                  |
|                                | Difficult / very difficult (ref) | -                                | 1.00                             | 1.00                             |
|                                | Very easy / easy                 | -                                | 1.37 (1.10, 1.70) <sup>*</sup>   | 1.37 (1.12, 1.68) <sup>**</sup>  |
| Mother communication           |                                  |                                  |                                  |                                  |
|                                | Difficult / very difficult (ref) | -                                | 1.00                             | -                                |
|                                | Very easy / easy                 | -                                | 0.96 (0.75, 1.22)                | -                                |
| Peer communication             |                                  |                                  |                                  |                                  |
|                                | Difficult / very difficult (ref) | -                                | 1.00                             | -                                |
|                                | Very easy / easy                 | -                                | 1.3 (0.90, 1.86)                 | -                                |

### School-level Controls

|                                                   |                     |                     |                   |
|---------------------------------------------------|---------------------|---------------------|-------------------|
| % expecting university attendance                 | -                   | 1.17 (0.54, 2.53)   | -                 |
| School-level family affluence                     |                     |                     |                   |
| % High (ref)                                      | -                   | 1.00                | -                 |
| % Medium                                          | -                   | 1.25 (0.45, 3.51)   | -                 |
| % Low                                             | -                   | 1.04 (0.42, 2.58)   | -                 |
| % leavers attending higher education              | -                   | 1.01 (1.00, 1.02)   | -                 |
| % achieving 5+ 'Standard Grade' awards at level 4 | -                   | 1.00 (0.98, 1.01)   | -                 |
| % liking school a lot / a bit                     | -                   | 1.00 (0.99, 1.01)   | -                 |
| Peer support                                      | -                   | 1.06 (0.87, 1.29)   | -                 |
| Teacher support                                   | -                   | 0.98 (0.82, 1.17)   | -                 |
| Constant                                          | 1.24 (1.07, 1.44)** | 4.73 (0.02, 984.67) | 1.28 (0.91, 1.81) |

<sup>a</sup> Model 3 removes from Model 2 all non-significant ( $p > 0.050$ ) student- and school-level covariates per health behaviour.

\*\*\*  $p < 0.001$ , \*\*  $p < 0.005$ , \*  $p < 0.050$ .

Electronic Supplementary Material Table 5 – Odds ratios (95% CI) from multi-level logistic regression models for twice daily tooth brushing ( $N=1,827$ ) in a 2010 sample of Scottish school children.

|                                  | <b>Model 1</b>                   | <b>Model 2</b>                   | <b>Model 3<sup>a</sup></b>       |
|----------------------------------|----------------------------------|----------------------------------|----------------------------------|
| University expectation           |                                  |                                  |                                  |
| No (ref)                         | 1.00                             | 1.00                             | 1.00                             |
| Yes                              | 1.75 (1.41, 2.17) <sup>***</sup> | 1.34 (1.05, 1.72) <sup>*</sup>   | 1.56 (1.25, 1.95) <sup>***</sup> |
| <b>Student-level Controls</b>    |                                  |                                  |                                  |
| Pubertal Development (PDS)       | -                                | 1.29 (1.00, 1.65) <sup>*</sup>   | 1.33 (1.04, 1.69) <sup>*</sup>   |
| Family affluence                 |                                  |                                  |                                  |
| High (ref)                       | -                                | 1.00                             | -                                |
| Medium                           | -                                | 0.79 (0.59, 1.05)                | -                                |
| Low                              | -                                | 0.77 (0.58, 1.02)                | -                                |
| Father absence                   |                                  |                                  |                                  |
| Father present (ref)             | -                                | 1.00                             | -                                |
| Father absent                    | -                                | 0.83 (0.64, 1.07)                | -                                |
| Age                              | -                                | 1.03 (0.71, 1.48)                | 1.04 (0.72, 1.49)                |
| Gender                           |                                  |                                  |                                  |
| Female (ref)                     | -                                | 1.00                             | 1.00                             |
| Male                             | -                                | 0.37 (0.29, 0.47) <sup>***</sup> | 0.37 (0.29, 0.47) <sup>***</sup> |
| Perceived academic achievement   |                                  |                                  |                                  |
| Very good (ref)                  | -                                | 1.00                             | -                                |
| Good                             | -                                | 0.99 (0.73, 1.35)                | -                                |
| Average                          | -                                | 0.85 (0.60, 1.20)                | -                                |
| Below average                    | -                                | 0.65 (0.38, 1.13)                | -                                |
| Father communication             |                                  |                                  |                                  |
| Difficult / very difficult (ref) | -                                | 1.00                             | 1.00                             |
| Very easy / easy                 | -                                | 1.43 (1.11, 1.83) <sup>*</sup>   | 1.56 (1.25, 1.95) <sup>***</sup> |
| Mother communication             |                                  |                                  |                                  |
| Difficult / very difficult (ref) | -                                | 1.00                             | -                                |
| Very easy / easy                 | -                                | 1.02 (0.78, 1.35)                | -                                |
| Peer communication               |                                  |                                  |                                  |
| Difficult / very difficult (ref) | -                                | 1.00                             | -                                |
| Very easy / easy                 | -                                | 1.17 (0.79, 1.72)                | -                                |



### School-level Controls

|                                                   |                      |                     |                     |
|---------------------------------------------------|----------------------|---------------------|---------------------|
| % expecting university attendance                 | -                    | 0.95 (0.38, 2.39)   | -                   |
| School-level family affluence                     |                      |                     |                     |
| % High (ref)                                      | -                    | 1.00                | -                   |
| % Medium                                          | -                    | 1.14 (0.33, 3.91)   | -                   |
| % Low                                             | -                    | 0.61 (0.21, 1.82)   | -                   |
| % leavers attending higher education              | -                    | 1.01 (0.99, 1.02)   | -                   |
| % achieving 5+ 'Standard Grade' awards at level 4 | -                    | 1.00 (0.98, 1.02)   | -                   |
| % liking school a lot / a bit                     | -                    | 1.00 (0.99, 1.01)   | -                   |
| Peer support                                      | -                    | 0.91 (0.72, 1.15)   | -                   |
| Teacher support                                   | -                    | 1.09 (0.88, 1.34)   | -                   |
| Constant                                          | 2.15 (1.84, 2.52)*** | 1.15 (0.00, 524.38) | 0.74 (0.00, 195.69) |

<sup>a</sup> Model 3 removes from Model 2 all non-significant ( $p > 0.050$ ) student- and school-level covariates per health behaviour, except age which is retained in all models featuring the pubertal development scale. \*\*\* $p < 0.001$ , \*\* $p < 0.005$ , \* $p < 0.050$ .

Electronic Supplementary Material Table 6 – Odds ratios (95% CI) from multi-level logistic regression models for daily crisps consumption ( $N=1,806$ ) in a 2010 sample of Scottish school children.

|                                |                                  | <b>Model 1</b>     | <b>Model 2</b>     | <b>Model 3<sup>a</sup></b> |
|--------------------------------|----------------------------------|--------------------|--------------------|----------------------------|
| University expectation         |                                  |                    |                    |                            |
|                                | No (ref)                         | 1.00               | 1.00               | 1.00                       |
|                                | Yes                              | 0.72 (0.57, 0.91)* | 0.76 (0.59, 0.99)* | 0.72 (0.57, 0.91)*         |
| <b>Student-level Controls</b>  |                                  |                    |                    |                            |
| Pubertal Development (PDS)     |                                  | -                  | 0.98 (0.75, 1.28)  | -                          |
| Family affluence               |                                  |                    |                    |                            |
|                                | High (ref)                       | -                  | 1.00               | -                          |
|                                | Medium                           | -                  | 1.03 (0.77, 1.39)  | -                          |
|                                | Low                              | -                  | 1.05 (0.78, 1.42)  | -                          |
| Father absence                 |                                  |                    |                    |                            |
|                                | Father present (ref)             | -                  | 1.00               | -                          |
|                                | Father absent                    | -                  | 1.19 (0.91, 1.55)  | -                          |
|                                | Age                              | -                  | 0.83 (0.57, 1.22)  | -                          |
| Gender                         |                                  |                    |                    |                            |
|                                | Female (ref)                     | -                  | 1.00               | -                          |
|                                | Male                             | -                  | 0.95 (0.74, 1.22)  | -                          |
| Perceived academic achievement |                                  |                    |                    |                            |
|                                | Very good (ref)                  | -                  | 1.00               | -                          |
|                                | Good                             | -                  | 0.81 (0.59, 1.11)  | -                          |
|                                | Average                          | -                  | 0.82 (0.58, 1.18)  | -                          |
|                                | Below average                    | -                  | 1.10 (0.61, 1.97)  | -                          |
| Father communication           |                                  |                    |                    |                            |
|                                | Difficult / very difficult (ref) | -                  | 1.00               | -                          |
|                                | Very easy / easy                 | -                  | 1.01 (0.78, 1.31)  | -                          |
| Mother communication           |                                  |                    |                    |                            |
|                                | Difficult / very difficult (ref) | -                  | 1.00               | -                          |
|                                | Very easy / easy                 | -                  | 0.98 (0.73, 1.32)  | -                          |
| Peer communication             |                                  |                    |                    |                            |
|                                | Difficult / very difficult (ref) | -                  | 1.00               | -                          |
|                                | Very easy / easy                 | -                  | 1.06 (0.68, 1.65)  | -                          |

**School-level Controls**

|                                                   |                      |                     |                      |
|---------------------------------------------------|----------------------|---------------------|----------------------|
| % expecting university attendance                 | -                    | 0.87 (0.33, 2.30)   | -                    |
| School-level family affluence                     |                      |                     |                      |
| % High (ref)                                      | -                    | 1.00                | -                    |
| % Medium                                          | -                    | 0.92 (0.25, 3.39)   | -                    |
| % Low                                             | -                    | 2.19 (0.70, 6.82)   | -                    |
| % leavers attending higher education              | -                    | 0.99 (0.97, 1.01)   | -                    |
| % achieving 5+ 'Standard Grade' awards at level 4 | -                    | 1.00 (0.98, 1.02)   | -                    |
| % liking school a lot / a bit                     | -                    | 0.99 (0.98, 1.01)   | -                    |
| Peer support                                      | -                    | 1.16 (0.91, 1.48)   | -                    |
| Teacher support                                   | -                    | 1.12 (0.90, 1.41)   | -                    |
| Constant                                          | 0.30 (0.25, 0.37)*** | 1.30 (0.00, 801.60) | 0.30 (0.25, 0.37)*** |

<sup>a</sup> Model 3 removes from Model 2 all non-significant ( $p > 0.050$ ) student- and school-level covariates per health behaviour.

\*\*\*  $p < 0.001$ , \*\*  $p < 0.005$ , \*  $p < 0.050$ .

Electronic Supplementary Material Table 7 – Odds ratios (95% CI) from multi-level logistic regression models for daily coke / sugary drinks consumption ( $N=1,830$ ) in a 2010 sample of Scottish school children.

|                                |                                  | <b>Model 1</b>                   | <b>Model 2</b>                   | <b>Model 3<sup>a</sup></b>       |
|--------------------------------|----------------------------------|----------------------------------|----------------------------------|----------------------------------|
| University expectation         |                                  |                                  |                                  |                                  |
|                                | No (ref)                         | 1.00                             | 1.00                             | 1.00                             |
|                                | Yes                              | 0.45 (0.36, 0.56) <sup>***</sup> | 0.59 (0.46, 0.76) <sup>***</sup> | 0.47 (0.38, 0.6) <sup>***</sup>  |
| <b>Student-level Controls</b>  |                                  |                                  |                                  |                                  |
| Pubertal Development (PDS)     |                                  | -                                | 1.14 (0.88, 1.46)                | -                                |
| Family affluence               |                                  |                                  |                                  |                                  |
|                                | High (ref)                       | -                                | 1.00                             | -                                |
|                                | Medium                           | -                                | 0.90 (0.68, 1.20)                | -                                |
|                                | Low                              | -                                | 1.1 (0.83, 1.46)                 | -                                |
| Father absence                 |                                  |                                  |                                  |                                  |
|                                | Father present (ref)             | -                                | 1.00                             | -                                |
|                                | Father absent                    | -                                | 1.15 (0.89, 1.48)                | -                                |
|                                | Age                              | -                                | 1.37 (0.95, 1.98)                | -                                |
| Gender                         |                                  |                                  |                                  |                                  |
|                                | Female (ref)                     | -                                | 1.00                             | 1.00                             |
|                                | Male                             | -                                | 1.77 (1.39, 2.25) <sup>***</sup> | 1.71 (1.37, 2.14) <sup>***</sup> |
| Perceived academic achievement |                                  |                                  |                                  |                                  |
|                                | Very good (ref)                  | -                                | 1.00                             | -                                |
|                                | Good                             | -                                | 0.85 (0.62, 1.16)                | -                                |
|                                | Average                          | -                                | 1.23 (0.88, 1.73)                | -                                |
|                                | Below average                    | -                                | 1.71 (0.99, 2.95)                | -                                |
| Father communication           |                                  |                                  |                                  |                                  |
|                                | Difficult / very difficult (ref) | -                                | 1.00                             | -                                |
|                                | Very easy / easy                 | -                                | 1.03 (0.80, 1.32)                | -                                |
| Mother communication           |                                  |                                  |                                  |                                  |
|                                | Difficult / very difficult (ref) | -                                | 1.00                             | -                                |
|                                | Very easy / easy                 | -                                | 0.85 (0.65, 1.13)                | -                                |
| Peer communication             |                                  |                                  |                                  |                                  |
|                                | Difficult / very difficult (ref) | -                                | 1.00                             | -                                |
|                                | Very easy / easy                 | -                                | 1.03 (0.68, 1.54)                | -                                |

### School-level Controls

|                                                   |                      |                    |                      |
|---------------------------------------------------|----------------------|--------------------|----------------------|
| % expecting university attendance                 | -                    | 0.75 (0.31, 1.82)  | -                    |
| School-level family affluence                     |                      |                    |                      |
| % High (ref)                                      | -                    | 1.00               | -                    |
| % Medium                                          | -                    | 0.57 (0.17, 1.89)  | -                    |
| % Low                                             | -                    | 2.25 (0.80, 6.29)  | -                    |
| % leavers attending higher education              | -                    | 0.99 (0.98, 1.01)  | -                    |
| % achieving 5+ 'Standard Grade' awards at level 4 | -                    | 0.99 (0.97, 1.00)  | -                    |
| % liking school a lot / a bit                     | -                    | 0.99 (0.98, 1.00)  | -                    |
| Peer support                                      | -                    | 1.07 (0.86, 1.34)  | -                    |
| Teacher support                                   | -                    | 1.22 (1, 1.49)     | -                    |
| Constant                                          | 0.49 (0.42, 0.58)*** | 0.00 (0.00, 0.69)* | 0.36 (0.29, 0.45)*** |

<sup>a</sup> Model 3 removes from Model 2 all non-significant ( $p > 0.050$ ) student- and school-level covariates per health behaviour.

\*\*\*  $p < 0.001$ , \*\*  $p < 0.005$ , \*  $p < 0.050$ .

Electronic Supplementary Material Table 8 – Odds ratios (95% CI) from multi-level logistic regression models for weekly alcohol consumption ( $N=1,736$ ) in a 2010 sample of Scottish school children.

|                                |                                  | <b>Model 1</b>       | <b>Model 2</b>       | <b>Model 3<sup>a</sup></b> |
|--------------------------------|----------------------------------|----------------------|----------------------|----------------------------|
| University expectation         |                                  |                      |                      |                            |
|                                | No (ref)                         | 1.00                 | 1.00                 | 1.00                       |
|                                | Yes                              | 0.41 (0.32, 0.51)*** | 0.52 (0.40, 0.67)*** | 0.50 (0.39, 0.64)***       |
| <b>Student-level Controls</b>  |                                  |                      |                      |                            |
| Pubertal Development (PDS)     |                                  | -                    | 1.39 (1.06, 1.81)*   | 1.31 (1.02, 1.69)*         |
| Family affluence               |                                  |                      |                      |                            |
|                                | High (ref)                       | -                    | 1.00                 | 1.00                       |
|                                | Medium                           | -                    | 0.70 (0.52, 0.93)*   | 0.69 (0.52, 0.91)*         |
|                                | Low                              | -                    | 0.69 (0.51, 0.92)*   | 0.66 (0.50, 0.88)**        |
| Father absence                 |                                  |                      |                      |                            |
|                                | Father present (ref)             | -                    | 1.00                 | 1.00                       |
|                                | Father absent                    | -                    | 1.40 (1.08, 1.81)*   | 1.39 (1.07, 1.79)*         |
|                                | Age                              | -                    | 1.36 (0.94, 1.98)    | 1.42 (0.98, 2.05)          |
| Gender                         |                                  |                      |                      |                            |
|                                | Female (ref)                     | -                    | 1.00                 | -                          |
|                                | Male                             | -                    | 1.21 (0.94, 1.54)    | -                          |
| Perceived academic achievement |                                  |                      |                      |                            |
|                                | Very good (ref)                  | -                    | 1.00                 | 1.00                       |
|                                | Good                             | -                    | 1.28 (0.91, 1.80)    | 1.30 (0.93, 1.82)          |
|                                | Average                          | -                    | 1.93 (1.34, 2.77)*** | 2.00 (1.40, 2.87)***       |
|                                | Below average                    | -                    | 3.36 (1.90, 5.92)*** | 3.64 (2.08, 6.38)***       |
| Father communication           |                                  |                      |                      |                            |
|                                | Difficult / very difficult (ref) | -                    | 1.00                 | -                          |
|                                | Very easy / easy                 | -                    | 0.94 (0.73, 1.21)    | -                          |
| Mother communication           |                                  |                      |                      |                            |
|                                | Difficult / very difficult (ref) | -                    | 1.00                 | 1.00                       |
|                                | Very easy / easy                 | -                    | 0.66 (0.5, 0.87)**   | 0.64 (0.49, 0.82)***       |
| Peer communication             |                                  |                      |                      |                            |
|                                | Difficult / very difficult (ref) | -                    | 1.00                 | 1.00                       |
|                                | Very easy / easy                 | -                    | 1.74 (1.1, 2.75)*    | 1.69 (1.07, 2.66)*         |

### School-level Controls

|                                                   |   |                      |                     |
|---------------------------------------------------|---|----------------------|---------------------|
| % expecting university attendance                 | - | 0.78 (0.33, 1.88)    | -                   |
| School-level family affluence                     |   |                      |                     |
| % High (ref)                                      | - | 1.00                 | -                   |
| % Medium                                          | - | 0.82 (0.25, 2.70)    | -                   |
| % Low                                             | - | 0.74 (0.25, 2.15)    | -                   |
| % leavers attending higher education              | - | 1.00 (0.99, 1.02)    | -                   |
| % achieving 5+ 'Standard Grade' awards at level 4 | - | 1.00 (0.98, 1.01)    | -                   |
| % liking school a lot / a bit                     | - | 0.99 (0.98, 1.00)*   | 0.98 (0.98, 0.99)** |
| Peer support                                      | - | 1.11 (0.89, 1.39)    | -                   |
| Teacher support                                   | - | 0.84 (0.69, 1.03)    | -                   |
| Constant                                          |   | 0.54 (0.46, 0.64)*** | 0.01 (0.00, 2.55)   |
|                                                   |   |                      | 0.00 (0.00, 0.55)*  |

<sup>a</sup> Model 3 removes from Model 2 all non-significant ( $p > 0.050$ ) student- and school-level covariates per health behaviour, except age which is retained in all models featuring the pubertal development scale. \*\*\* $p < 0.001$ , \*\* $p < 0.005$ , \* $p < 0.050$ .

Electronic Supplementary Material Table 9 – Odds ratios (95% CI) from multi-level logistic regression models for ever smoked tobacco ( $N=1,831$ ) in a 2010 sample of Scottish school children.

|                                |                                  | <b>Model 1</b>                   | <b>Model 2</b>                    | <b>Model 3<sup>a</sup></b>        |
|--------------------------------|----------------------------------|----------------------------------|-----------------------------------|-----------------------------------|
| University expectation         |                                  |                                  |                                   |                                   |
|                                | No (ref)                         | 1.00                             | 1.00                              | 1.00                              |
|                                | Yes                              | 0.42 (0.34, 0.51) <sup>***</sup> | 0.49 (0.39, 0.62) <sup>***</sup>  | 0.50 (0.40, 0.62) <sup>***</sup>  |
| <b>Student-level Controls</b>  |                                  |                                  |                                   |                                   |
| Pubertal Development (PDS)     |                                  | -                                | 1.58 (1.24, 2.03) <sup>***</sup>  | 1.61 (1.26, 2.06) <sup>***</sup>  |
| Family affluence               |                                  |                                  |                                   |                                   |
|                                | High (ref)                       | -                                | 1.00                              | 1.00                              |
|                                | Medium                           | -                                | 0.86 (0.67, 1.12)                 | -                                 |
|                                | Low                              | -                                | 0.79 (0.61, 1.04)                 | -                                 |
| Father absence                 |                                  |                                  |                                   |                                   |
|                                | Father present (ref)             | -                                | 1.00                              | 1.00                              |
|                                | Father absent                    | -                                | 1.72 (1.35, 2.19) <sup>***</sup>  | 1.66 (1.31, 2.11) <sup>***</sup>  |
|                                | Age                              | -                                | 1.73 (1.23, 2.45) <sup>**</sup>   | 1.73 (1.22, 2.44) <sup>**</sup>   |
| Gender                         |                                  |                                  |                                   |                                   |
|                                | Female (ref)                     | -                                | 1.00                              | 1.00                              |
|                                | Male                             | -                                | 0.62 (0.49, 0.78) <sup>***</sup>  | 1.73 (1.22, 2.44) <sup>***</sup>  |
| Perceived academic achievement |                                  |                                  |                                   |                                   |
|                                | Very good (ref)                  | -                                | 1.00                              | 1.00                              |
|                                | Good                             | -                                | 1.54 (1.14, 2.07) <sup>**</sup>   | 1.56 (1.16, 2.09) <sup>**</sup>   |
|                                | Average                          | -                                | 2.32 (1.68, 3.21) <sup>***</sup>  | 2.35 (1.70, 3.25) <sup>***</sup>  |
|                                | Below average                    | -                                | 7.07 (3.84, 13.00) <sup>***</sup> | 7.37 (4.01, 13.54) <sup>***</sup> |
| Father communication           |                                  |                                  |                                   |                                   |
|                                | Difficult / very difficult (ref) | -                                | 1.00                              | -                                 |
|                                | Very easy / easy                 | -                                | 0.86 (0.68, 1.08)                 | -                                 |
| Mother communication           |                                  |                                  |                                   |                                   |
|                                | Difficult / very difficult (ref) | -                                | 1.00                              | 1.00                              |
|                                | Very easy / easy                 | -                                | 0.61 (0.47, 0.79) <sup>***</sup>  | 0.58 (0.46, 0.74) <sup>***</sup>  |
| Peer communication             |                                  |                                  |                                   |                                   |
|                                | Difficult / very difficult (ref) | -                                | 1.00                              | 1.00                              |
|                                | Very easy / easy                 | -                                | 1.68 (1.11, 2.55) <sup>*</sup>    | 1.67 (1.11, 2.53) <sup>*</sup>    |



### School-level Controls

|                                                   |                   |                    |                     |
|---------------------------------------------------|-------------------|--------------------|---------------------|
| % expecting university attendance                 | -                 | 0.70 (0.28, 1.72)  | -                   |
| School-level family affluence                     |                   |                    |                     |
| % High (ref)                                      | -                 | 1.00               | -                   |
| % Medium                                          | -                 | 1.28 (0.38, 4.33)  | -                   |
| % Low                                             | -                 | 0.89 (0.30, 2.61)  | -                   |
| % leavers attending higher education              | -                 | 1.01 (1.00, 1.03)  | -                   |
| % achieving 5+ 'Standard Grade' awards at level 4 | -                 | 0.99 (0.97, 1.01)  | -                   |
| % liking school a lot / a bit                     | -                 | 0.99 (0.98, 1.01)  | -                   |
| Peer support                                      | -                 | 0.99 (0.79, 1.25)  | -                   |
| Teacher support                                   | -                 | 0.78 (0.64, 0.97)* | 0.72 (0.60, 0.87)** |
| Constant                                          | 0.99 (0.84, 1.16) | 0.00 (0.00, 0.13)* | 0.00 (0.00, 0.07)** |

<sup>a</sup> Model 3 removes from Model 2 all non-significant ( $p > 0.050$ ) student- and school-level covariates per health behaviour, except age which is retained in all models featuring the pubertal development scale. \*\*\* $p < 0.001$ , \*\* $p < 0.005$ , \* $p < 0.050$ .

Electronic Supplementary Material Table 10 – Odds ratios (95% CI) from multi-level logistic regression models for ever smoked cannabis ( $N=1,821$ ) in a 2010 sample of Scottish school children.

|                                |                                  | <b>Model 1</b>                   | <b>Model 2</b>                    | <b>Model 3<sup>a</sup></b>        |
|--------------------------------|----------------------------------|----------------------------------|-----------------------------------|-----------------------------------|
| University expectation         |                                  |                                  |                                   |                                   |
|                                | No (ref)                         | 1.00                             | 1.00                              | 1.00                              |
|                                | Yes                              | 0.43 (0.33, 0.55) <sup>***</sup> | 0.56 (0.42, 0.75) <sup>***</sup>  | 0.58 (0.44, 0.77) <sup>***</sup>  |
| <b>Student-level Controls</b>  |                                  |                                  |                                   |                                   |
| Pubertal Development (PDS)     |                                  | -                                | 1.66 (1.22, 2.25) <sup>**</sup>   | 1.70 (1.26, 2.30) <sup>**</sup>   |
| Family affluence               |                                  |                                  |                                   |                                   |
|                                | High (ref)                       | -                                | 1.00                              | -                                 |
|                                | Medium                           | -                                | 0.88 (0.64, 1.22)                 | -                                 |
|                                | Low                              | -                                | 0.93 (0.67, 1.28)                 | -                                 |
| Father absence                 |                                  |                                  |                                   |                                   |
|                                | Father present (ref)             | -                                | 1.00                              | 1.00                              |
|                                | Father absent                    | -                                | 1.65 (1.25, 2.19) <sup>***</sup>  | 1.62 (1.23, 2.14) <sup>**</sup>   |
|                                | Age                              | -                                | 1.50 (0.99, 2.29)                 | 1.51 (0.99, 2.30)                 |
| Gender                         |                                  |                                  |                                   |                                   |
|                                | Female (ref)                     | -                                | 1.00                              | 1.00                              |
|                                | Male                             | -                                | 1.49 (1.13, 1.96) <sup>**</sup>   | 1.46 (1.12, 1.92) <sup>*</sup>    |
| Perceived academic achievement |                                  |                                  |                                   |                                   |
|                                | Very good (ref)                  | -                                | 1.00                              | 1.00                              |
|                                | Good                             | -                                | 1.30 (0.88, 1.94)                 | 1.29 (0.87, 1.92)                 |
|                                | Average                          | -                                | 2.05 (1.35, 3.12) <sup>**</sup>   | 2.01 (1.33, 3.05) <sup>**</sup>   |
|                                | Below average                    | -                                | 5.75 (3.14, 10.53) <sup>***</sup> | 5.73 (3.14, 10.43) <sup>***</sup> |
| Father communication           |                                  |                                  |                                   |                                   |
|                                | Difficult / very difficult (ref) | -                                | 1.00                              | -                                 |
|                                | Very easy / easy                 | -                                | 1.00 (0.75, 1.33)                 | -                                 |
| Mother communication           |                                  |                                  |                                   |                                   |
|                                | Difficult / very difficult (ref) | -                                | 1.00                              | 1.00                              |
|                                | Very easy / easy                 | -                                | 0.68 (0.50, 0.92) <sup>*</sup>    | 0.70 (0.53, 0.92) <sup>*</sup>    |
| Peer communication             |                                  |                                  |                                   |                                   |
|                                | Difficult / very difficult (ref) | -                                | 1.00                              | -                                 |
|                                | Very easy / easy                 | -                                | 1.52 (0.91, 2.53)                 | -                                 |

### School-level Controls

|                                                   |                      |                     |                     |
|---------------------------------------------------|----------------------|---------------------|---------------------|
| % expecting university attendance                 | -                    | 1.58 (0.54, 4.58)   | -                   |
| School-level family affluence                     |                      |                     |                     |
| % High (ref)                                      | -                    | 1.00                | -                   |
| % Medium                                          | -                    | 1.25 (0.30, 5.31)   | -                   |
| % Low                                             | -                    | 1.33 (0.37, 4.79)   | -                   |
| % leavers attending higher education              | -                    | 1.02 (1.00, 1.04)*  | 1.03 (1.01, 1.04)** |
| % achieving 5+ 'Standard Grade' awards at level 4 | -                    | 0.97 (0.95, 0.99)** | 0.97 (0.95, 0.99)** |
| % liking school a lot / a bit                     | -                    | 1.00 (0.99, 1.02)   | -                   |
| Peer support                                      | -                    | 1.09 (0.83, 1.44)   | -                   |
| Teacher support                                   | -                    | 0.73 (0.57, 0.94)*  | 0.78 (0.63, 0.96)*  |
| Constant                                          | 0.32 (0.26, 0.38)*** | 0.00 (0.00, 0.82)*  | 0.00 (0.00, 1.37)   |

<sup>a</sup> Model 3 removes from Model 2 all non-significant ( $p > 0.050$ ) student- and school-level covariates per health behaviour, except age which is retained in all models featuring the pubertal development scale. \*\*\* $p < 0.001$ , \*\* $p < 0.005$ , \* $p < 0.050$ .

Electronic Supplementary Material Table 11 – Odds ratios (95% CI) from multi-level logistic regression models for one or more fights ( $N=1,792$ ) in a 2010 sample of Scottish school children.

|                                |                                  | <b>Model 1</b>                   | <b>Model 2</b>                   | <b>Model 3<sup>a</sup></b>       |
|--------------------------------|----------------------------------|----------------------------------|----------------------------------|----------------------------------|
| University expectation         |                                  |                                  |                                  |                                  |
|                                | No (ref)                         | 1.00                             | 1.00                             | 1.00                             |
|                                | Yes                              | 0.46 (0.37, 0.57) <sup>***</sup> | 0.62 (0.48, 0.79) <sup>***</sup> | 0.66 (0.52, 0.84) <sup>**</sup>  |
| <b>Student-level Controls</b>  |                                  |                                  |                                  |                                  |
| Pubertal Development (PDS)     |                                  | -                                | 1.25 (0.97, 1.61)                | -                                |
| Family affluence               |                                  |                                  |                                  |                                  |
|                                | High (ref)                       | -                                | 1.00                             | 1.00                             |
|                                | Medium                           | -                                | 0.75 (0.56, 0.99) <sup>*</sup>   | 0.73 (0.56, 0.96) <sup>*</sup>   |
|                                | Low                              | -                                | 0.96 (0.72, 1.26)                | 0.90 (0.69, 1.17)                |
| Father absence                 |                                  |                                  |                                  |                                  |
|                                | Father present (ref)             | -                                | 1.00                             | 1.00                             |
|                                | Father absent                    | -                                | 1.45 (1.13, 1.86) <sup>**</sup>  | 1.42 (1.11, 1.82) <sup>**</sup>  |
|                                | Age                              | -                                | 1.10 (0.77, 1.57)                | -                                |
| Gender                         |                                  |                                  |                                  |                                  |
|                                | Female (ref)                     | -                                | 1.00                             | 1.00                             |
|                                | Male                             | -                                | 2.50 (1.97, 3.17) <sup>***</sup> | 2.33 (1.86, 2.92) <sup>***</sup> |
| Perceived academic achievement |                                  |                                  |                                  |                                  |
|                                | Very good (ref)                  | -                                | 1.00                             | 1.00                             |
|                                | Good                             | -                                | 1.36 (0.99, 1.86)                | 1.34 (0.98, 1.84)                |
|                                | Average                          | -                                | 2.00 (1.41, 2.83) <sup>***</sup> | 2.02 (1.44, 2.85) <sup>***</sup> |
|                                | Below average                    | -                                | 4.49 (2.56, 7.88) <sup>***</sup> | 4.59 (2.64, 7.98) <sup>***</sup> |
| Father communication           |                                  |                                  |                                  |                                  |
|                                | Difficult / very difficult (ref) | -                                | 1.00                             | 1.00                             |
|                                | Very easy / easy                 | -                                | 0.78 (0.61, 1.00) <sup>*</sup>   | 0.74 (0.59, 0.92) <sup>*</sup>   |
| Mother communication           |                                  |                                  |                                  |                                  |
|                                | Difficult / very difficult (ref) | -                                | 1.00                             | -                                |
|                                | Very easy / easy                 | -                                | 0.80 (0.61, 1.04)                | -                                |
| Peer communication             |                                  |                                  |                                  |                                  |
|                                | Difficult / very difficult (ref) | -                                | 1.00                             | -                                |
|                                | Very easy / easy                 | -                                | 1.41 (0.93, 2.13)                | -                                |

### School-level Controls

|                                                   |                      |                    |                    |
|---------------------------------------------------|----------------------|--------------------|--------------------|
| % expecting university attendance                 | -                    | 1.37 (0.57, 3.29)  | -                  |
| School-level family affluence                     |                      |                    |                    |
| % High (ref)                                      | -                    | 1.00               | -                  |
| % Medium                                          | -                    | 1.27 (0.40, 4.09)  | -                  |
| % Low                                             | -                    | 0.83 (0.29, 2.35)  | -                  |
| % leavers attending higher education              | -                    | 1.01 (1.00, 1.03)  | -                  |
| % achieving 5+ 'Standard Grade' awards at level 4 | -                    | 0.99 (0.98, 1.01)  | -                  |
| % liking school a lot / a bit                     | -                    | 0.99 (0.98, 1.00)* | 0.99 (0.98, 1.00)* |
| Peer support                                      | -                    | 0.89 (0.71, 1.11)  | -                  |
| Teacher support                                   | -                    | 1.10 (0.90, 1.34)  | -                  |
| Constant                                          | 0.62 (0.53, 0.72)*** | 0.07 (0.00, 27.46) | 0.49 (0.24, 1.01)  |

<sup>a</sup> Model 3 removes from Model 2 all non-significant ( $p > 0.050$ ) student- and school-level covariates per health behaviour, except age which is retained in all models featuring the pubertal development scale. \*\*\* $p < 0.001$ , \*\* $p < 0.005$ , \* $p < 0.050$ .

Electronic Supplementary Material Table 12 – Odds ratios (95% CI) from multi-level logistic regression models for had sexual intercourse ( $N=1,806$ ) in a 2010 sample of Scottish school children.

|                                |                                  | <b>Model 1</b>       | <b>Model 2</b>       | <b>Model 3<sup>a</sup></b> |
|--------------------------------|----------------------------------|----------------------|----------------------|----------------------------|
| University expectation         | No (ref)                         | 1.00                 | 1.00                 | 1.00                       |
|                                | Yes                              | 0.42 (0.34, 0.52)*** | 0.51 (0.40, 0.65)*** | 0.49 (0.39, 0.62)***       |
| <b>Student-level Controls</b>  |                                  |                      |                      |                            |
| Pubertal Development (PDS)     |                                  | -                    | 1.66 (1.28, 2.16)**  | 1.64 (1.26, 2.13)**        |
| Family affluence               | High (ref)                       | -                    | 1.00                 | -                          |
|                                | Medium                           | -                    | 0.92 (0.70, 1.22)    | -                          |
|                                | Low                              | -                    | 0.96 (0.72, 1.26)    | -                          |
| Father absence                 | Father present (ref)             | -                    | 1.00                 | 1.00                       |
|                                | Father absent                    | -                    | 1.63 (1.28, 2.09)*** | 1.67 (1.31, 2.13)***       |
|                                | Age                              | -                    | 1.87 (1.31, 2.69)**  | 1.85 (1.29, 2.66)**        |
| Gender                         | Female (ref)                     | -                    | 1.00                 | 1.00                       |
|                                | Male                             | -                    | 0.59 (0.46, 0.74)*** | 0.57 (0.45, 0.72)***       |
| Perceived academic achievement | Very good (ref)                  | -                    | 1.00                 | 1.00                       |
|                                | Good                             | -                    | 1.26 (0.92, 1.72)    | 1.28 (0.94, 1.75)          |
|                                | Average                          | -                    | 1.86 (1.33, 2.62)*** | 1.93 (1.38, 2.71)***       |
|                                | Below average                    | -                    | 4.75 (2.70, 8.36)*** | 5.26 (3.01, 9.19)***       |
| Father communication           | Difficult / very difficult (ref) | -                    | 1.00                 | -                          |
|                                | Very easy / easy                 | -                    | 0.90 (0.71, 1.14)    | -                          |
| Mother communication           | Difficult / very difficult (ref) | -                    | 1.00                 | -                          |
|                                | Very easy / easy                 | -                    | 0.77 (0.59, 1.01)    | -                          |
| Peer communication             | Difficult / very difficult (ref) | -                    | 1.00                 | 1.00                       |
|                                | Very easy / easy                 | -                    | 2.14 (1.34, 3.42)**  | 1.94 (1.22, 3.08)*         |

### School-level Controls

|                                                   |                      |                     |                      |
|---------------------------------------------------|----------------------|---------------------|----------------------|
| % expecting university attendance                 | -                    | 0.56 (0.23, 1.35)   | -                    |
| School-level family affluence                     |                      |                     |                      |
| % High (ref)                                      | -                    | 1.00                | -                    |
| % Medium                                          | -                    | 1.51 (0.46, 4.91)   | -                    |
| % Low                                             | -                    | 1.65 (0.59, 4.66)   | -                    |
| % leavers attending higher education              | -                    | 1.01 (1.00, 1.03)   | -                    |
| % achieving 5+ 'Standard Grade' awards at level 4 | -                    | 0.99 (0.97, 1.01)   | -                    |
| % liking school a lot / a bit                     | -                    | 0.99 (0.98, 1.00)*  | 0.98 (0.98, 0.99)**  |
| Peer support                                      | -                    | 0.87 (0.70, 1.09)   | -                    |
| Teacher support                                   | -                    | 0.98 (0.80, 1.21)   | -                    |
| Constant                                          | 0.67 (0.58, 0.79)*** | 0.00 (0.00, 0.02)** | 0.00 (0.00, 0.00)*** |

<sup>a</sup> Model 3 removes from Model 2 all non-significant ( $p > 0.050$ ) student- and school-level covariates per health behaviour, except age which is retained in all models featuring the pubertal development scale. \*\*\* $p < 0.001$ , \*\* $p < 0.005$ , \* $p < 0.050$ .
